# Supplementary material for: Impact of Non-Antibiotic Antibacterial Substances against Multidrug Resistant Staphylococcus aureus, E. coli and Klebsiella
Source: Preprints.org preprint supplement (doi:10.20944/preprints202409.2261.v1), 2024-09-30
Supplement: Supplementary file 1 [file supplementary]

**References:**

Agrawal KS, AV Sarda, R Shrotriya, M Bachhav, V Puri and G Nataraj, 2017. Acetic acid dressings: Finding the Holy Grail for infected wound management. Ind J of Plastic Surgery. 50: 273-280. doi: 10.4103/ijps.IJPS_245_16.

Alvarado-Casillas, S, S Ibarra-Sánchez, O Rodríguez-García, N Martínez-Gonzáles and A Castillo, 2007. Comparison of rinsing and sanitizing procedures for reducing bacterial pathogens on fresh cantaloupes and bell peppers. J Food Prot, 70: 655-660. doi: 10.4315/0362-028x-70.3.655.

Beuchat LR and DA Golden, 1989. Antimicrobials Occurring Naturally in Foods. Food Technol, 43: 134-142.

Chikezie O, 2017. Determination of minimum inhibitory concentration (MIC) and minimum bactericidal concentration (MBC) using a novel dilution tube method. Af J of Microbiol Res, 11: 977-980. DOI:[10.5897/AJMR2017.8545](http://dx.doi.org/10.5897/AJMR2017.8545" \t "_blank)

Cooper R and K Kirketerp-Moller, 2018. Non-antibiotic antimicrobial interventions and antimicrobial stewardship in wound care. J Wound Care, 2: 355-377. doi: 10.12968/jowc.2018.27.6.355.

English KB and AH Gaur, 2010. The Use and Abuse of Antibiotics and the Development of Antibiotic Resistance. Advances in experimental medicine and biology, 659: 73-82. doi: 10.1007/978-1-4419-0981-7_6.

Feng L, X Mengxin, Z Weiliang, Z Xiaodong, W Sipei, Y Zhuocheng, Z Tieli, S Shiyi, C Jianming and C Lijiang, 2022. Evaluation of the antibacterial, antibioflm, and anti-virulence effects of acetic acid and the related mechanisms on colistin-resistant *Pseudomonas aeruginosa*. BMC Microbiol, 22: 306-311. doi: 10.1186/s12866-022-02716-6.

Garza-Cervantes JA, G Mendiola-Garza and A León-Buitimea, 2023*.* Synergistic antibacterial effects of exopolysaccharides/nickel-nanoparticles composites against multidrug-resistant bacteria. Sci Rep,13: 21519. <https://doi.org/10.1038/s41598-023-48821-y>

Jacopin EJ, S Lehtinen, F Débarre and F Blanquart, 2020. Factors favouring the evolution of multidrug resistance in bacteria. J R Soc Interface,17: 20200105. [**https://doi.org/10.1098/rsif.2020.0105**](https://doi.org/10.1098/rsif.2020.0105)

Jenkin RE and R Cooper, 2012. Synergy between oxacillin and manuka honey sensitizes methicillin-resistant *Staphylococcus aureus* to oxacillin. J Antimicrob Chemother, 67: 1405-1407. doi: 10.1093/jac/dks071.

Ji Q-Y, W Wang , H Yan , H Qu, Y Liu ,Y Qian and R Gu, 2023. The Effect of Different Organic Acids and Their Combination on the Cell Barrier and Biofilm of *Escherichia coli*. Foods*.* 12 (16): 3011.  [**https://doi.org/10.3390/foods12163011**](https://doi.org/10.3390/foods12163011)

Kapoor G, S Saigal and A Elongavan, 2017. Action and resistance mechanisms of antibiotics. A guide for clinicians. J Anaesthesiol Clin Pharmacol, 33: 300-305. doi: 10.4103/joacp.JOACP_349_15.

Kramer A, J Dissemond, S Kim, C Willy, D Mayer and R Papke, 2018. Consensus on Wound Antisepsis. Skin Pharmacol and Physio, 31: 28-58. doi: 10.1159/000481545.

Mishra PK, H Mishra, A Ekielski, S Talegaonkar and B Vaidya, 2017. Zinc oxide nanoparticles: a promising nanomaterial for biomedical applications. Drug Discovery Today, 22(12): 1825-1834. doi: 10.1016/j.drudis.2017.08.006.

Montinari MR, S Minelli and R De-Caterina, 2019. The first 3500 years of aspirin history from its roots - A concise summary. Vascular Pharmacol, 113: 1-8. doi: 10.1016/j.vph.2018.10.008.

Naseri-Nosar M and ZM Ziora, 2018. Wound dressings from naturally-occurring polymers: A review on homopolysaccharide-based composites. Carbohyd Polym, 189: 379-398. <https://doi.org/10.1016/j.carbpol.2018.02.003>.

Nwobodo CD, MC Ugwu, AC Oliseloke, MTS Al-Ouqaili, IJ Chinedu, CU Victor and M Saki, 2022. Antibiotic resistance: The challenges and some emerging strategies for tackling a global menace. J Clin Lab Anal, 36(9): e24655. doi: 10.1002/jcla.24655.

Paelinck H and S Szczepaniak, 2005. New strategies for the preservation of cooked ham. Polish J of Food and Nutri Sci, 55(1): 37-40.

Park SB and GS Cho, 2011. Antimicrobial Activity of Extracts and Fractions of Ginkgo biloba Leaves, Seed and Outer Seedcoat. J of the Korean Soci Of Food Sci and Nutri, 40: 7-13. DOI:[10.3746/jkfn.2011.40.1.007](http://dx.doi.org/10.3746/jkfn.2011.40.1.007" \t "_blank)

Qadri H, HS Abdul, MA Syed, A Bader, A Abdullah and AM Manzoor, 2022. Natural products and their semi-synthetic derivatives against antimicrobial-resistant human pathogenic bacteria and fungi. Saudi J of Biol Sci, 29(9): 103376. doi: 10.1016/j.sjbs.2022.103376.

Singh A, RT Duche, AG Wandhare, JK Sian, BP Singh, MK Sihag, KS Singh, V Sangwan, S Talan and H Panwar, 2022. Milk-Derived Antimicrobial Peptides: Overview, Applications, and Future Perspectives. Probiotics Antimicrob Proteins, 15(1): 44-62. doi: [10.1007/s12602-022-10004-y](https://doi.org/10.1007%2Fs12602-022-10004-y)

Sykes, EME, W Dawn, M Sydney and K Ayush, 2024. Salicylic acids and pathogenic bacteria: new perspectives on an old compound. Canadian J of Microbiol,70(1): 1-14. doi: 10.1139/cjm-2023-0123

Tapouk FA, R Nabizadeh, N Mirzaei, NH Jazani, M Yousefi and MAV Hasanloei, 2020. Comparative efficacy of hospital disinfectants against nosocomial infection pathogens. Antimicrob Resist & Inf Control, 9; 115-122. https://doi.org/10.1186/s13756-020-00781-y.

Tawre MS, EE Kamble, SN Kumkar, MS Mulani and KR Pardesi, 2021. Antibiofilm and antipersister activity of acetic acid against extensively drug resistant *Pseudomonas aeruginosa* PAW1. PLoS ONE, 16: e0246020. doi: 10.1371/journal.pone.0246020.

Ye-Won I, K Jung-Ji, K Hyun-Jung and O Se-Wook, 2013. Antimicrobial Activities of Acetic Acid, Citric Acid and Lactic Acid against *Shigella* Species. J of food Sci, 33: 79-85. [**https://doi.org/10.1111/jfs.12025**](https://doi.org/10.1111/jfs.12025)

Yoon JH, SL Ingale, JS Kim, KH Kim, SH Lee, YK Park, IK Kwon and BJ Chae, 2012. Effects of dietary supplementation of antimicrobial peptide-A3 on growth performance, nutrient digestibility, intestinal and fecal microflora and intestinal morphology in weanling pigs. Animal Feed Sci and Technol, 177: 98-107. <https://doi.org/10.1016/j.anifeedsci.2012.06.009>.
